# Supplementary material
Source: publisher figshare collection journal article supplement (https://karger.figshare.com/ndownloader/files/25712831)
Supplement: Supplementary file 1 [file 25712831]

# Supplementary Information

First reported case in Romania of a successfully treated severe COVID-19 in a kidney transplant recipient. A focus on acute kidney injury

Flaviu Tosa 1,*, Roxana Manaila 2,*,, Alina Elec 3, Tudor Moisoiu 4, Liviu Ghervan4,5, Florin Elec 4,5,*

1 Intensive Care Unit, Clinical Institute of Urology and Renal Transplantation, Clinicilor Str., no. 4-6, 400006 Cluj-Napoca, Romania;

2  Department of Nephrology, Emergency County Hospital Cluj-Napoca 400006, Clinicilor Str., no 3-5, Romania;

3 Department of Nephrology, Clinical Institute of Urology and Renal Transplantation, Clinicilor Str., no. 4-6, 400006 Cluj-Napoca, Romania; dralinaelec@gmail.com

4 Department of Transplantation, Clinical Institute of Urology and Renal Transplantation, Clinicilor Str., no. 4-6, 400006 Cluj-Napoca, Romania; tmoisoiu@gmail.com

5 Department of Urology, Iuliu Hațieganu University of Medicine and Pharmacy Cluj-Napoca, Clinicilor Str., no. 4-6, 400006 Cluj-Napoca, Romania; liviughervan@yahoo.com

***** Correspondence:

Flaviu Tosa: ICU Department, Clinical Institute of Urology and Renal Transplantation Cluj-Napoca, Clinicilor Str., no. 4-6, 400006 Cluj-Napoca, Romania;

Email: flaviu.tosa25@gmail.com

Phone: +40-745-041-586

Roxana Manaila: 2  Department of Nephrology, County Emergency Hospital Cluj-Napoca, Clinicilor Str., no 3-5, 400006, Romania

Email: [roxanamanaila@gmail.com](mailto:roxanamanaila@gmail.com)

Phone: 40-759-119-143

Florin Elec: Department of Transplantation, Clinical Institute of Urology and Renal Transplantation Cluj-Napoca, Clinicilor Str., no. 4-6, 400006 Cluj-Napoca, Romania;

Email: ioan.elec@gmail.com

Phone: +40-722-822-740

Supplementary Table 1

| **Measure** | **Reference Range** | | **City Hospital** | | **Day 10** | **Day 11** | **Day 12** | **Day 13** | **Day 14** | **Day 15** | **Day 16** |
| --- | --- | --- | --- | --- | --- | --- | --- | --- | --- | --- | --- |
| Hemoglobin  g/dL | | 13.1-17.2 | | 14 | 14.2 | 14.2 | 12.3 | 12.4 | 11.9 | 11.8 | 12 |
| Leucocytes  (×109/L) | | 4-10 | | 1.9 | 14 | 10 | 5.8 | 6.3 | 7 | 8 | 6.5 |
| Ferritin  ng/mL | | 30-400 | | 857 | 895 | 854 | - | 865 | 900 | 894 | 977 |
| CRP  mg/dL | | <0.5 | | 3.8 | 11.3 | 11.9 | 11,7 | 6,6 | 5.2 | 4.8 | 4.6 |
| Procalcitonine  ng/mL | | <0.5 | | 0.4 | 0.42 | 0.85 | 0.49 | 0.27 | 0.28 | - | 0.35 |
| D-dimers  ng/mL | | <250 | | 967 | 1704 | 1121 | 991 | 1713 | 2172 | 1396 | - |
| LDH  U/L | | 135-225 | | 481 | 741 | 658 | 855 | 574 | - | 594 | - |
| AST/ALT  U/L | | <50/<50 | | 46.45 | 51/33 | 34/28 | 74/80 | - | - | 66/170 | 52/142 |

Abbreviations: ALT, alanine aminotransferase; AST, aspartate aminotransferase; CRP, C-reactive protein; LDH, lactate dehydrogenase

Supplementary Table 2

| **Respiratory parameter** | **Day 10** | **Day 11** | **Day 13** | **Day 14** |
| --- | --- | --- | --- | --- |
| EPAP  (cm H2O) | 10 | 10 | 9 | 9 |
| IPAP | 20 | 20 | - | - |
| FiO2 (%) | 75 | 60 | 35 | 30 |
| PaO2/ FiO2 | 117,132 | 168,222 | 256 | 307 |
| PaO2 (mmHg) | 78 | 59 | 76 | 92 |
| PaCO2  (mmHg) | 47 | 39 | 41 | 37 |

Abbreviations: EPAP, expiratory positive airway pressure; IPAP, inspiratory positive airway pressure
